# Supplementary material
Source: PubMed Central journal article supplement (PMC4000747)
Supplement: NIHMS554390-supplement-01.pdf [file NIHMS554390-supplement-01.pdf]

Type of file: figure

Label: Figure S1

Filename: McCue and McCoy 2013 Imputation Validation fig S1.pdf

**Figure S1:** Complete pipeline for imputation of equine genotyping data. The progression of file types is represented in ovals on the left side, while the program or utility associated with each step is shown in the boxes on the right.

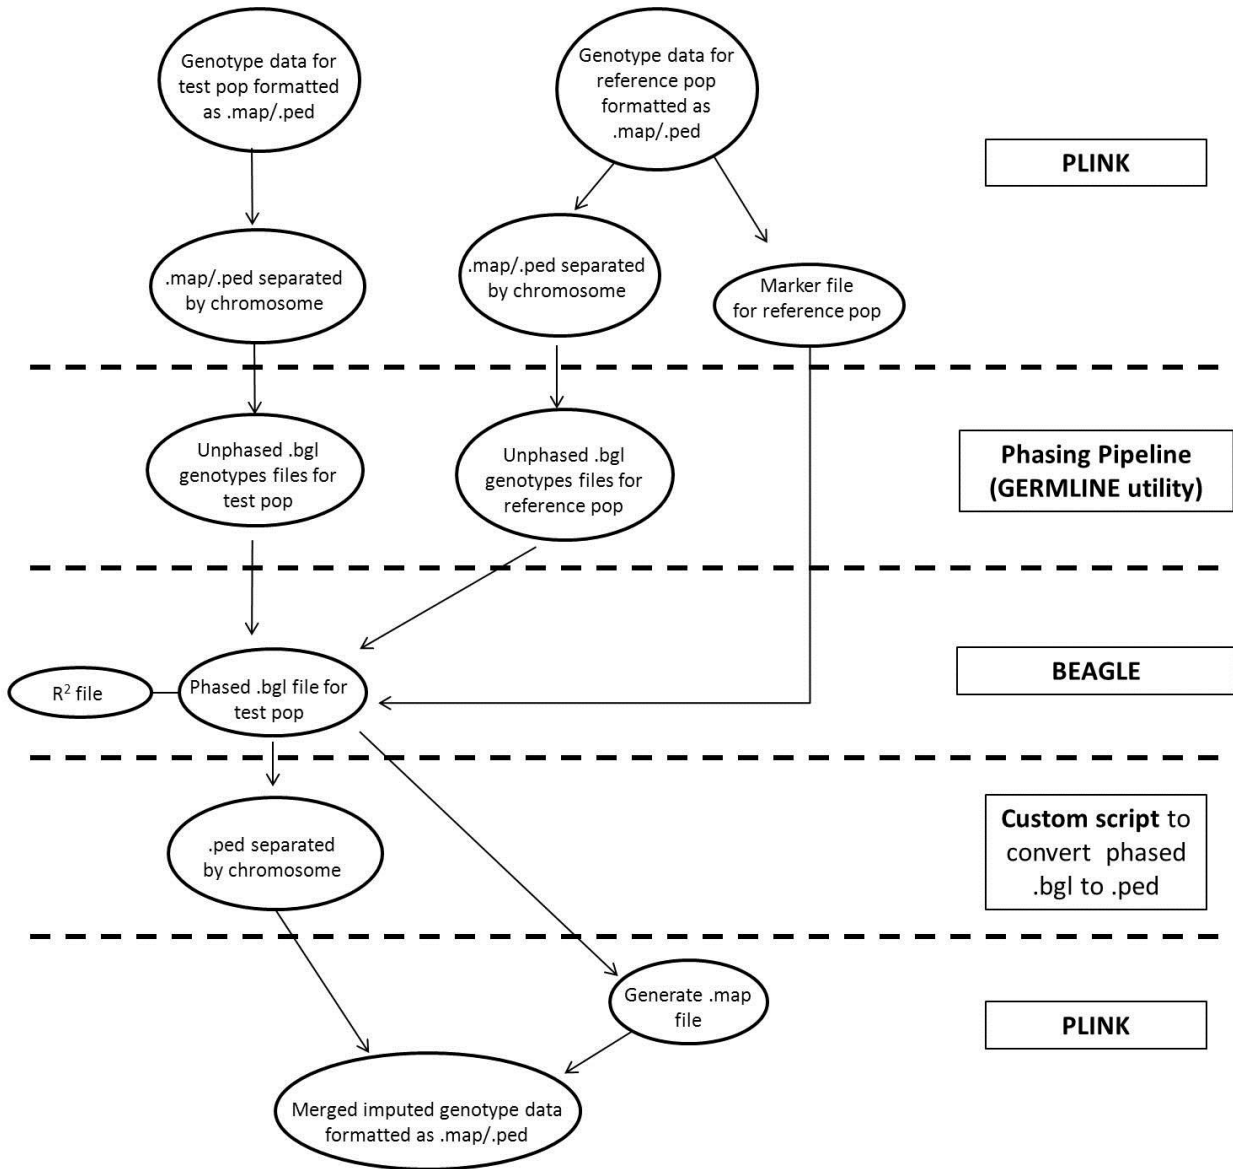

Type of file: figure

Label: Figure S2

Filename: Supplemental\_Figure\_S2.tif

# Mean Imputation Success in All Breeds (Same Breed Ref Pop) All Chr, Test Pop n=10

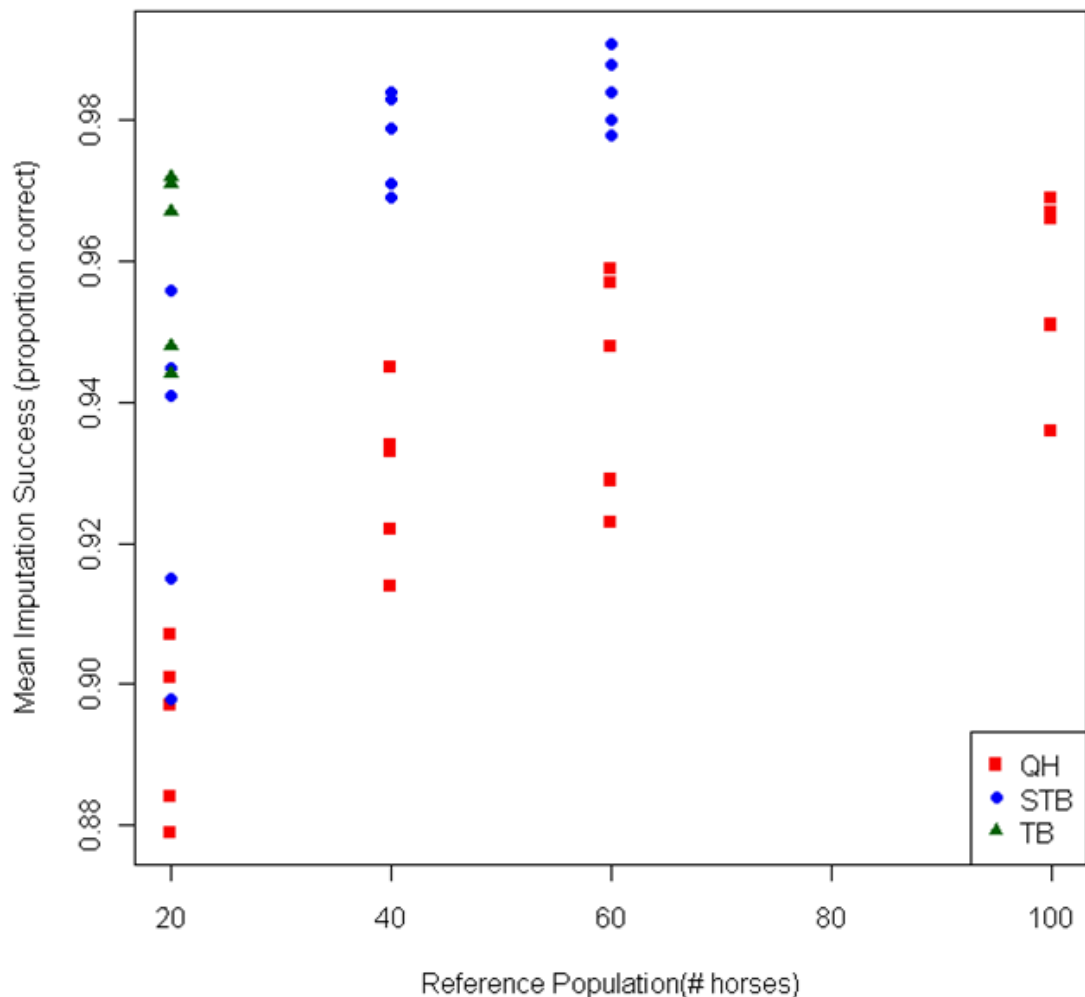

Type of file: figure

Label: Figure S3

Filename: Supplemental\_Figure\_S3.jpg

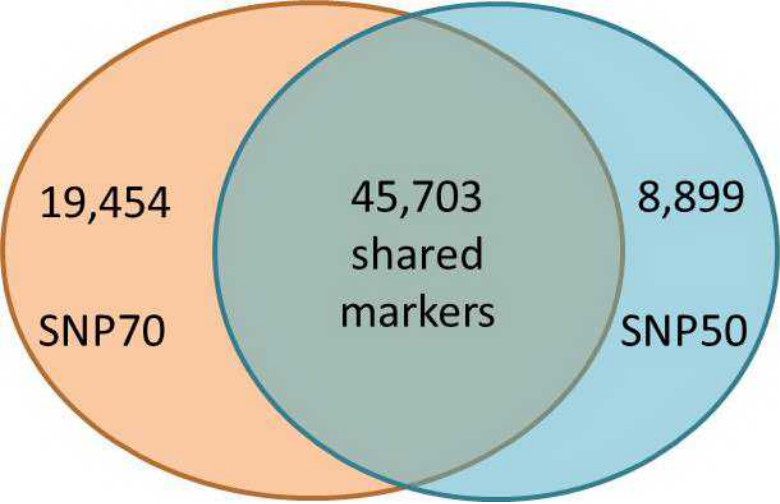

Type of file: table

Label: Table S1

Filename: Supplemental\_Table\_S1.xlsx

|                                                                                        |                          |       |       |       |       |                           |       |       |       |       |                          |       |       |       |       |                         |       |       |       |       |                        |       |       |       |       |
|----------------------------------------------------------------------------------------|--------------------------|-------|-------|-------|-------|---------------------------|-------|-------|-------|-------|--------------------------|-------|-------|-------|-------|-------------------------|-------|-------|-------|-------|------------------------|-------|-------|-------|-------|
| Imputed pop breed<br># in imputed pop<br>Reference pop breed<br># in reference pop     | QH<br>5<br>QH<br>40      |       |       |       |       | QH<br>10<br>QH<br>40      |       |       |       |       | QH<br>20<br>QH<br>40     |       |       |       |       | QH<br>30<br>QH<br>40    |       |       |       |       | QH<br>10<br>QH<br>60   |       |       |       |       |
| Chromosome                                                                             | ECA1                     | ECA6  | ECA15 | ECA26 | ECAX  | ECA1                      | ECA6  | ECA15 | ECA26 | ECAX  | ECA1                     | ECA6  | ECA15 | ECA26 | ECAX  | ECA1                    | ECA6  | ECA15 | ECA26 | ECAX  | ECA1                   | ECA6  | ECA15 | ECA26 | ECAX  |
| # SNPs in reference panel                                                              | 4835                     | 2412  | 2533  | 964   | 3342  | 4835                      | 2412  | 2533  | 964   | 3342  | 4835                     | 2412  | 2533  | 964   | 3342  | 4835                    | 2412  | 2533  | 964   | 3342  | 4835                   | 2412  | 2533  | 964   | 3342  |
| # SNPs imputed                                                                         | 1468                     | 767   | 733   | 365   | 1173  | 1468                      | 767   | 733   | 365   | 1173  | 1468                     | 767   | 733   | 365   | 1173  | 1468                    | 767   | 733   | 365   | 1173  | 1468                   | 767   | 733   | 365   | 1173  |
| Mean imputation success                                                                | 0.936                    | 0.914 | 0.939 | 0.926 | 0.937 | 0.945                     | 0.922 | 0.933 | 0.934 | 0.914 | 0.944                    | 0.925 | 0.936 | 0.930 | 0.921 | 0.941                   | 0.918 | 0.932 | 0.928 | 0.925 | 0.959                  | 0.929 | 0.957 | 0.948 | 0.923 |
| Minimum individual imputation success                                                  | 0.909                    | 0.896 | 0.903 | 0.907 | 0.886 | 0.921                     | 0.893 | 0.912 | 0.912 | 0.866 | 0.914                    | 0.872 | 0.911 | 0.89  | 0.872 | 0.884                   | 0.87  | 0.888 | 0.88  | 0.883 | 0.942                  | 0.897 | 0.936 | 0.925 | 0.882 |
| Maximum individual imputation success                                                  | 0.945                    | 0.924 | 0.971 | 0.961 | 0.965 | 0.978                     | 0.938 | 0.955 | 0.954 | 0.952 | 0.978                    | 0.958 | 0.955 | 0.967 | 0.978 | 0.962                   | 0.977 | 0.969 | 0.975 | 0.974 | 0.975                  | 0.952 | 0.971 | 0.98  | 0.955 |
| Mean r <sup>2</sup> for imputed SNPs                                                   | 0.686                    | 0.697 | 0.696 | 0.690 | 0.834 | 0.721                     | 0.643 | 0.692 | 0.677 | 0.703 | 0.712                    | 0.655 | 0.657 | 0.669 | 0.724 | 0.693                   | 0.655 | 0.698 | 0.670 | 0.751 | 0.768                  | 0.7   | 0.765 | 0.737 | 0.764 |
| % SNPs r <sup>2</sup> < 0.5                                                            | 0.17                     | 0.15  | 0.17  | 0.17  | 0.07  | 0.15                      | 0.22  | 0.19  | 0.20  | 0.16  | 0.16                     | 0.21  | 0.23  | 0.21  | 0.15  | 0.18                    | 0.24  | 0.17  | 0.22  | 0.12  | 0.10                   | 0.18  | 0.12  | 0.13  | 0.11  |
| Test (imputed) pop breed<br># in test pop<br>Reference pop breed<br># in reference pop | QH<br>20<br>QH<br>60     |       |       |       |       | QH<br>30<br>QH<br>60      |       |       |       |       | QH<br>10<br>QH<br>100    |       |       |       |       | QH<br>20<br>QH<br>100   |       |       |       |       | QH<br>30<br>QH<br>100  |       |       |       |       |
| Chromosome                                                                             | ECA1                     | ECA6  | ECA15 | ECA26 | ECAX  | ECA1                      | ECA6  | ECA15 | ECA26 | ECAX  | ECA1                     | ECA6  | ECA15 | ECA26 | ECAX  | ECA1                    | ECA6  | ECA15 | ECA26 | ECAX  | ECA1                   | ECA6  | ECA15 | ECA26 | ECAX  |
| # SNPs in reference panel                                                              | 4835                     | 2412  | 2533  | 964   | 3342  | 4835                      | 2412  | 2533  | 964   | 3342  | 4835                     | 2412  | 2533  | 964   | 3342  | 4835                    | 2412  | 2533  | 964   | 3342  | 4835                   | 2412  | 2533  | 964   | 3342  |
| # SNPs imputed                                                                         | 1468                     | 767   | 733   | 365   | 1173  | 1468                      | 767   | 733   | 365   | 1173  | 1468                     | 767   | 733   | 365   | 1173  | 1468                    | 767   | 733   | 365   | 1173  | 1468                   | 767   | 733   | 365   | 1173  |
| Mean imputation success                                                                | 0.955                    | 0.936 | 0.954 | 0.947 | 0.927 | 0.956                     | 0.931 | 0.952 | 0.941 | 0.935 | 0.969                    | 0.951 | 0.967 | 0.966 | 0.936 | 0.964                   | 0.949 | 0.964 | 0.959 | 0.937 | 0.969                  | 0.945 | 0.968 | 0.953 | 0.953 |
| Minimum individual imputation success                                                  | 0.925                    | 0.898 | 0.923 | 0.897 | 0.876 | 0.897                     | 0.884 | 0.915 | 0.892 | 0.876 | 0.938                    | 0.923 | 0.947 | 0.951 | 0.874 | 0.937                   | 0.917 | 0.945 | 0.918 | 0.88  | 0.897                  | 0.877 | 0.917 | 0.895 | 0.903 |
| Maximum individual imputation success                                                  | 0.981                    | 0.969 | 0.979 | 0.991 | 0.97  | 0.983                     | 0.983 | 0.988 | 0.994 | 0.993 | 0.988                    | 0.972 | 0.98  | 0.99  | 0.977 | 0.987                   | 0.976 | 0.985 | 0.994 | 0.973 | 0.991                  | 0.984 | 0.996 | 0.996 | 0.993 |
| Mean r <sup>2</sup> for imputed SNPs                                                   | 0.758                    | 0.717 | 0.741 | 0.738 | 0.73  | 0.76                      | 0.711 | 0.739 | 0.718 | 0.772 | 0.818                    | 0.764 | 0.837 | 0.819 | 0.779 | 0.805                   | 0.771 | 0.806 | 0.796 | 0.757 | 0.815                  | 0.748 | 0.82  | 0.779 | 0.816 |
| % SNPs r <sup>2</sup> < 0.5                                                            | 0.11                     | 0.15  | 0.13  | 0.15  | 0.15  | 0.12                      | 0.17  | 0.14  | 0.18  | 0.10  | 0.06                     | 0.11  | 0.05  | 0.06  | 0.10  | 0.07                    | 0.11  | 0.07  | 0.08  | 0.12  | 0.06                   | 0.13  | 0.06  | 0.07  | 0.07  |
| Test (imputed) pop breed<br># in test pop<br>Reference pop breed<br># in reference pop | QH<br>10<br>Mixed<br>100 |       |       |       |       | QH<br>20<br>Mixed<br>100  |       |       |       |       | QH<br>30<br>Mixed<br>100 |       |       |       |       | QH<br>10<br>QH<br>20    |       |       |       |       | STB<br>10<br>STB<br>40 |       |       |       |       |
| Chromosome                                                                             | ECA1                     | ECA6  | ECA15 | ECA26 | ECAX  | ECA1                      | ECA6  | ECA15 | ECA26 | ECAX  | ECA1                     | ECA6  | ECA15 | ECA26 | ECAX  | ECA1                    | ECA6  | ECA15 | ECA26 | ECAX  | ECA1                   | ECA6  | ECA15 | ECA26 | ECAX  |
| # SNPs in reference panel                                                              | 4839                     | 2413  | 2538  | 964   | 3351  | 4839                      | 2413  | 2538  | 964   | 3351  | 4839                     | 2413  | 2538  | 964   | 3351  | 4839                    | 2413  | 2538  | 964   | 3351  | 4839                   | 2413  | 2538  | 964   | 3351  |
| # SNPs imputed                                                                         | 1471                     | 768   | 736   | 365   | 1178  | 1471                      | 768   | 736   | 365   | 1178  | 1471                     | 768   | 736   | 365   | 1178  | 1468                    | 767   | 733   | 365   | 1173  | 1468                   | 767   | 733   | 365   | 1173  |
| Mean imputation success                                                                | 0.956                    | 0.928 | 0.953 | 0.953 | 0.923 | 0.955                     | 0.937 | 0.95  | 0.953 | 0.925 | 0.954                    | 0.928 | 0.952 | 0.945 | 0.935 | 0.901                   | 0.879 | 0.897 | 0.884 | 0.907 | 0.983                  | 0.969 | 0.984 | 0.971 | 0.979 |
| Minimum individual imputation success                                                  | 0.93                     | 0.907 | 0.936 | 0.925 | 0.878 | 0.927                     | 0.883 | 0.927 | 0.904 | 0.879 | 0.89                     | 0.87  | 0.903 | 0.885 | 0.888 | 0.881                   | 0.861 | 0.87  | 0.849 | 0.851 | 0.971                  | 0.946 | 0.971 | 0.914 | 0.953 |
| Maximum individual imputation success                                                  | 0.978                    | 0.943 | 0.968 | 0.983 | 0.965 | 0.985                     | 0.969 | 0.972 | 0.992 | 0.969 | 0.986                    | 0.977 | 0.986 | 0.99  | 0.99  | 0.938                   | 0.904 | 0.924 | 0.912 | 0.968 | 0.996                  | 0.989 | 0.996 | 0.994 | 0.994 |
| Mean r <sup>2</sup> for imputed SNPs                                                   | 0.8                      | 0.726 | 0.785 | 0.799 | 0.734 | 0.784                     | 0.735 | 0.763 | 0.779 | 0.735 | 0.766                    | 0.726 | 0.768 | 0.763 | 0.78  | 0.624                   | 0.649 | 0.582 | 0.598 | 0.711 | 0.981                  | 0.815 | 0.908 | 0.836 | 0.899 |
| % SNPs r <sup>2</sup> < 0.5                                                            | 0.07                     | 0.13  | 0.09  | 0.08  | 0.14  | 0.09                      | 0.15  | 0.12  | 0.11  | 0.15  | 0.11                     | 0.15  | 0.10  | 0.13  | 0.10  | 0.19                    | 0.17  | 0.23  | 0.21  | 0.14  | 0.02                   | 0.08  | 0.02  | 0.05  | 0.03  |
| Test (imputed) pop breed<br># in test pop<br>Reference pop breed<br># in reference pop | STB<br>10<br>STB<br>60   |       |       |       |       | STB<br>10<br>Mixed<br>100 |       |       |       |       | STB<br>10<br>STB<br>20   |       |       |       |       | TB<br>10<br>Mixed<br>90 |       |       |       |       | TB<br>10<br>TB<br>20   |       |       |       |       |
| Chromosome                                                                             | ECA1                     | ECA6  | ECA15 | ECA26 | ECAX  | ECA1                      | ECA6  | ECA15 | ECA26 | ECAX  | ECA1                     | ECA6  | ECA15 | ECA26 | ECAX  | ECA1                    | ECA6  | ECA15 | ECA26 | ECAX  | ECA1                   | ECA6  | ECA15 | ECA26 | ECAX  |
| # SNPs in reference panel                                                              | 4839                     | 2413  | 2538  | 964   | 3352  | 4839                      | 2413  | 2538  | 964   | 3352  | 4835                     | 2412  | 2533  | 964   | 3342  | 4839                    | 2413  | 2538  | 964   | 3351  | 4839                   | 2413  | 2538  | 964   | 3351  |
| # SNPs imputed                                                                         | 1468                     | 767   | 733   | 365   | 1174  | 1472                      | 768   | 738   | 365   | 1182  | 1468                     | 767   | 733   | 365   | 1174  | 1471                    | 768   | 736   | 365   | 1177  | 1471                   | 768   | 736   | 365   | 1177  |
| Mean imputation success                                                                | 0.988                    | 0.978 | 0.991 | 0.98  | 0.984 | 0.986                     | 0.965 | 0.986 | 0.971 | 0.976 | 0.945                    | 0.915 | 0.956 | 0.898 | 0.941 | 0.987                   | 0.97  | 0.989 | 0.983 | 0.968 | 0.971                  | 0.944 | 0.972 | 0.967 | 0.948 |
| Minimum individual imputation success                                                  | 0.975                    | 0.956 | 0.983 | 0.937 | 0.972 | 0.974                     | 0.946 | 0.979 | 0.934 | 0.956 | 0.939                    | 0.887 | 0.92  | 0.822 | 0.908 | 0.98                    | 0.948 | 0.977 | 0.961 | 0.945 | 0.951                  | 0.904 | 0.955 | 0.949 | 0.855 |
| Maximum individual imputation success                                                  | 1                        | 0.991 | 0.998 | 0.999 | 0.992 | 0.996                     | 0.995 | 0.993 | 0.994 | 0.988 | 0.972                    | 0.936 | 0.978 | 0.944 | 0.974 | 0.995                   | 0.991 | 0.996 | 0.994 | 0.987 | 0.99                   | 0.976 | 0.984 | 0.986 | 0.991 |
| Mean r <sup>2</sup> for imputed SNPs                                                   | 0.923                    | 0.869 | 0.939 | 0.905 | 0.918 | 0.903                     | 0.842 | 0.906 | 0.818 | 0.872 | 0.756                    | 0.645 | 0.751 | 0.601 | 0.789 | 0.912                   | 0.824 | 0.914 | 0.906 | 0.909 | 0.84                   | 0.802 | 0.832 | 0.837 | 0.926 |
| % SNPs r <sup>2</sup> < 0.5                                                            | 0.01                     | 0.07  | 0.01  | 0.02  | 0.03  | 0.02                      | 0.08  | 0.01  | 0.05  | 0.05  | 0.11                     | 0.19  | 0.13  | 0.22  | 0.09  | 0.01                    | 0.08  | 0.01  | 0.02  | 0.04  | 0.07                   | 0.09  | 0.08  | 0.09  | 0.03  |



Type of file: table

Label: Table S2

Filename: Supplemental\_Table\_S2.xlsx

| SNP50 → SNP70 |        |                |              |                   |                    | SNP70 |        |                |
|---------------|--------|----------------|--------------|-------------------|--------------------|-------|--------|----------------|
| Chr           | # SNPs | # SNPs imputed | # SNP errors | # genotype errors | imputation success | Chr   | # SNPs | # SNPs imputed |
| 1             | 4835   | 1456           | 80           | 103               | 0.982              | 1     | 4357   | 978            |
| 2             | 3430   | 1042           | 57           | 73                | 0.982              | 2     | 2801   | 413            |
| 3             | 3019   | 860            | 56           | 70                | 0.980              | 3     | 2809   | 650            |
| 4             | 2938   | 808            | 80           | 97                | 0.970              | 4     | 2549   | 419            |
| 5             | 2737   | 772            | 49           | 55                | 0.982              | 5     | 2261   | 296            |
| 6             | 2412   | 755            | 52           | 68                | 0.977              | 6     | 1850   | 193            |
| 7             | 2607   | 745            | 51           | 66                | 0.978              | 7     | 2229   | 367            |
| 8             | 2654   | 780            | 37           | 54                | 0.983              | 8     | 2159   | 285            |
| 9             | 2336   | 675            | 35           | 48                | 0.982              | 9     | 1958   | 297            |
| 10            | 2306   | 684            | 53           | 62                | 0.977              | 10    | 1910   | 288            |
| 11            | 1790   | 554            | 24           | 35                | 0.984              | 11    | 1451   | 215            |
| 12            | 876    | 285            | 27           | 39                | 0.966              | 12    | 707    | 116            |
| 13            | 1136   | 362            | 24           | 40                | 0.972              | 13    | 955    | 181            |
| 14            | 2670   | 710            | 37           | 50                | 0.982              | 14    | 2222   | 262            |
| 15            | 2533   | 720            | 22           | 32                | 0.989              | 15    | 2150   | 337            |
| 16            | 2416   | 686            | 65           | 71                | 0.974              | 16    | 2078   | 348            |
| 17            | 2184   | 511            | 38           | 43                | 0.979              | 17    | 1869   | 196            |
| 18            | 2146   | 554            | 40           | 60                | 0.973              | 18    | 1908   | 316            |
| 19            | 1716   | 471            | 26           | 39                | 0.979              | 19    | 1414   | 169            |
| 20            | 1778   | 537            | 41           | 55                | 0.974              | 20    | 1475   | 234            |
| 21            | 1678   | 462            | 34           | 44                | 0.976              | 21    | 1349   | 133            |
| 22            | 1416   | 383            | 29           | 36                | 0.977              | 22    | 1177   | 144            |
| 23            | 1498   | 408            | 20           | 22                | 0.987              | 23    | 1241   | 151            |
| 24            | 1401   | 404            | 24           | 28                | 0.983              | 24    | 1094   | 97             |
| 25            | 1070   | 318            | 21           | 29                | 0.977              | 25    | 924    | 172            |
| 26            | 964    | 362            | 11           | 12                | 0.992              | 26    | 957    | 355            |
| 27            | 1066   | 325            | 18           | 24                | 0.982              | 27    | 871    | 130            |
| 28            | 1245   | 336            | 31           | 31                | 0.977              | 28    | 1090   | 181            |
| 29            | 803    | 180            | 21           | 28                | 0.961              | 29    | 769    | 146            |
| 30            | 813    | 222            | 10           | 12                | 0.986              | 30    | 713    | 122            |
| 31            | 638    | 185            | 23           | 26                | 0.965              | 31    | 595    | 142            |
| X             | 3342   | 1171           | 128          | 205               | 0.956              | X     | 2530   | 359            |

→ SNP50

| # SNP errors | # genotype errors | imputation success |
|--------------|-------------------|--------------------|
| 69           | 87                | 0.978              |
| 47           | 62                | 0.962              |
| 36           | 53                | 0.980              |
| 28           | 35                | 0.979              |
| 27           | 33                | 0.972              |
| 35           | 51                | 0.934              |
| 22           | 33                | 0.978              |
| 30           | 45                | 0.961              |
| 36           | 54                | 0.955              |
| 30           | 53                | 0.954              |
| 17           | 20                | 0.977              |
| 18           | 31                | 0.933              |
| 13           | 21                | 0.971              |
| 32           | 44                | 0.958              |
| 21           | 26                | 0.981              |
| 31           | 34                | 0.976              |
| 26           | 30                | 0.962              |
| 23           | 37                | 0.971              |
| 15           | 20                | 0.970              |
| 32           | 46                | 0.951              |
| 18           | 20                | 0.962              |
| 20           | 29                | 0.950              |
| 13           | 18                | 0.970              |
| 15           | 22                | 0.943              |
| 11           | 20                | 0.971              |
| 11           | 15                | 0.989              |
| 11           | 15                | 0.971              |
| 5            | 9                 | 0.988              |
| 8            | 13                | 0.978              |
| 7            | 9                 | 0.982              |
| 12           | 14                | 0.975              |
| 68           | 119               | 0.917              |

Type of file: table

Label: Table S3

Filename: Supplemental\_Table\_S3.xlsx

|                                              |             |             |              |              |             |
|----------------------------------------------|-------------|-------------|--------------|--------------|-------------|
| <b>Test (imputed) pop breed</b>              | QH          |             |              |              |             |
| <b># in test pop</b>                         | 30          |             |              |              |             |
| <b>Reference pop breed</b>                   | Mixed       |             |              |              |             |
| <b># in reference pop</b>                    | 280         |             |              |              |             |
| <b>Chromosome</b>                            | <b>ECA1</b> | <b>ECA6</b> | <b>ECA15</b> | <b>ECA26</b> | <b>ECAX</b> |
| <b># SNPs in reference panel</b>             | 4373        | 1858        | 2154         | 958          | 2541        |
| <b># SNPs imputed</b>                        | 997         | 209         | 352          | 357          | 344         |
| <b>Mean imputation success</b>               | 0.937       | 0.964       | 0.94         | 0.932        | 0.936       |
| <b>Minimum individual imputation success</b> | 0.884       | 0.924       | 0.908        | 0.874        | 0.895       |
| <b>Maximum individual imputation success</b> | 0.978       | 0.988       | 0.968        | 0.979        | 0.965       |
| <b>Mean r<sup>2</sup> for imputed SNPs</b>   | 0.682       | 0.795       | 0.723        | 0.680        | 0.746       |
| <b>% SNPs r<sup>2</sup> &lt; 0.5</b>         | 0.25        | 0.08        | 0.17         | 0.23         | 0.14        |

The NIHMS has received the file 'McCue and McCoy 2013 Imputation Validation suppl text.pdf' as supplementary data. The file will not appear in this PDF Receipt, but it will be linked to the web version of your manuscript.
